# Supplementary material for: Nitrogen-doped hollow carbon spheres as chemical vapour sensors
Source: Royal Society of Chemistry journal article supplement (doi:10.1039/c9nj00628a), 2019-01-01
Supplement: c9nj00628a1.pdf [file c9nj00628a1.pdf]

## SUPPLEMENTARY MATERIAL

### Nitrogen-doped hollow carbon spheres as chemical vapour sensors

Bridget K. Mutuma<sup>ac\*</sup>, Clara I. Garcia-Martinez<sup>b</sup>, Rodrigo C. Dias<sup>b</sup>, Boitumelo J. Matsoso<sup>ad</sup>, Neil J. Coville<sup>a</sup>,  
and Ivo A. Hümmelgen<sup>b,e</sup>

<sup>a</sup> DST-NRF Centre of Excellence in Strong Materials and the Molecular Sciences Institute, School of Chemistry, University of the Witwatersrand, WITS 2050, Johannesburg, South Africa.

<sup>b</sup> Departamento de Física, Universidade Federal do Parana, Caixa Postal 19044, 8153-980 Curitiba, PR, Brazil. E-mail:

<sup>c</sup> Department of Physics, Institute of Applied Materials, University of Pretoria, 0028, Pretoria, South Africa. E-mail:

[bridgetmutuma@gmail.com](mailto:bridgetmutuma@gmail.com); Tel: +2712-420-6780

<sup>d</sup> Laboratoire des Multimatiériaux et Interfaces, UMR-5615 CNRS, Université Claude Bernard Lyon 1, Villeurbanne-Cedex

<sup>e</sup> Deceased

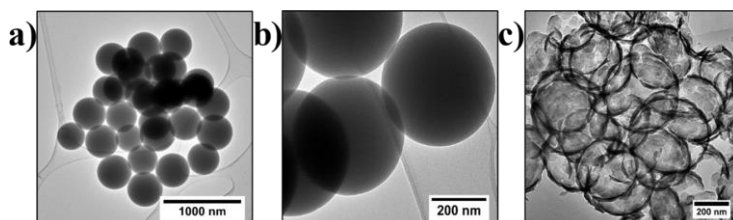

**Figure S1:** TEM images of; (a-b) SiO<sub>2</sub> spheres and (b) N-HCSs-50.

Figure S2b inset shows the pore size distribution calculated by the Barrett-Joyner-Halenda (BJH) method with a broad peaks observed between 20 and 100 nm for all the HCSs; characteristic of the presence of pores and voids in the mesoporous and macroporous region<sup>1</sup>. In the N-HCSs-50, a sharp peak was observed at 100 nm indicating the creation of macropores probably resulting from void of the broken HCSs.

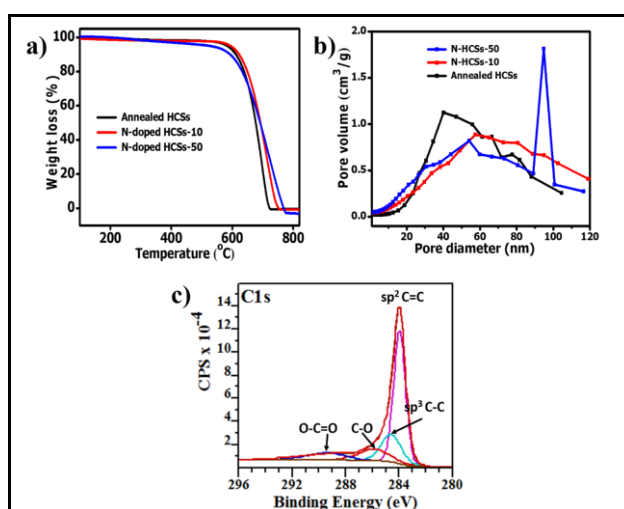

**Figure S2:** Thermal gravimetric curves, (b) pore size distribution plots of annealed HCSs and N-HCSs and (c) C 1s spectra of annealed HCSs.

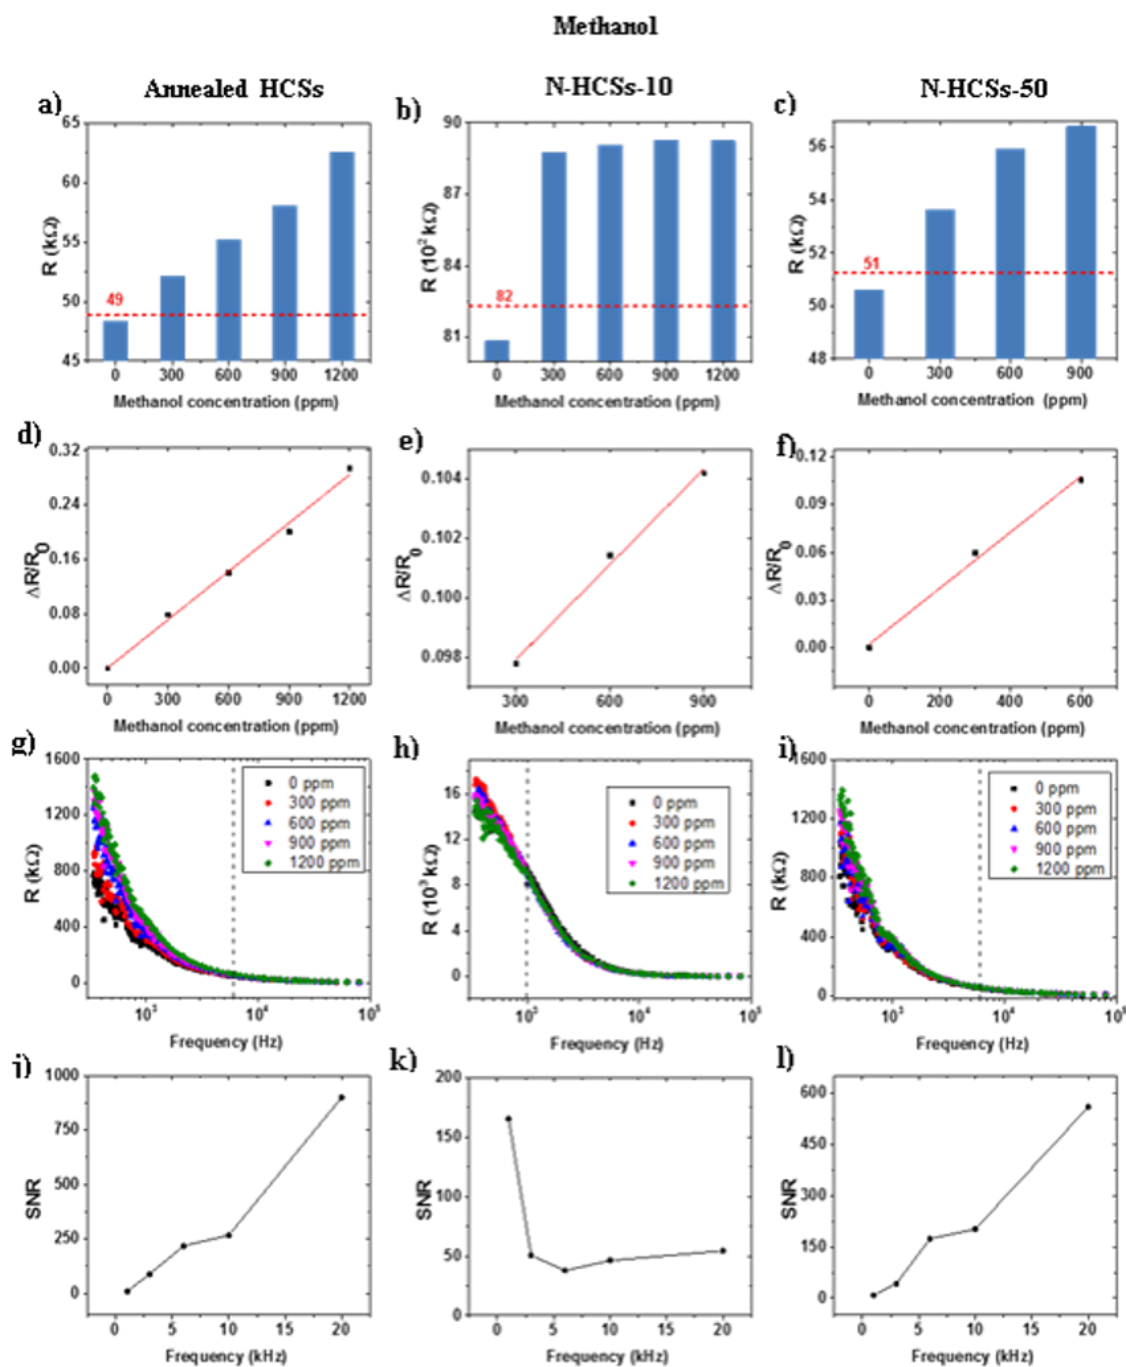

**Figure S3:** (a-c) Sensor resistance as a function of analyte (methanol) concentration, the red line indicates the estimated  $LoD$  resistance of the corresponding sensor; (d-f) response of the sensor versus analyte concentration; (g-i) sensor resistance dependence on frequency, dashed line indicates the optimum operating frequency and (j-l) sensor signal to noise ratio as a function of frequency. Corresponding results based on annealed HCSs, N-HCSs-10 and N-HCSs-50 are presented in the first, second and third column, respectively.

## Toluene

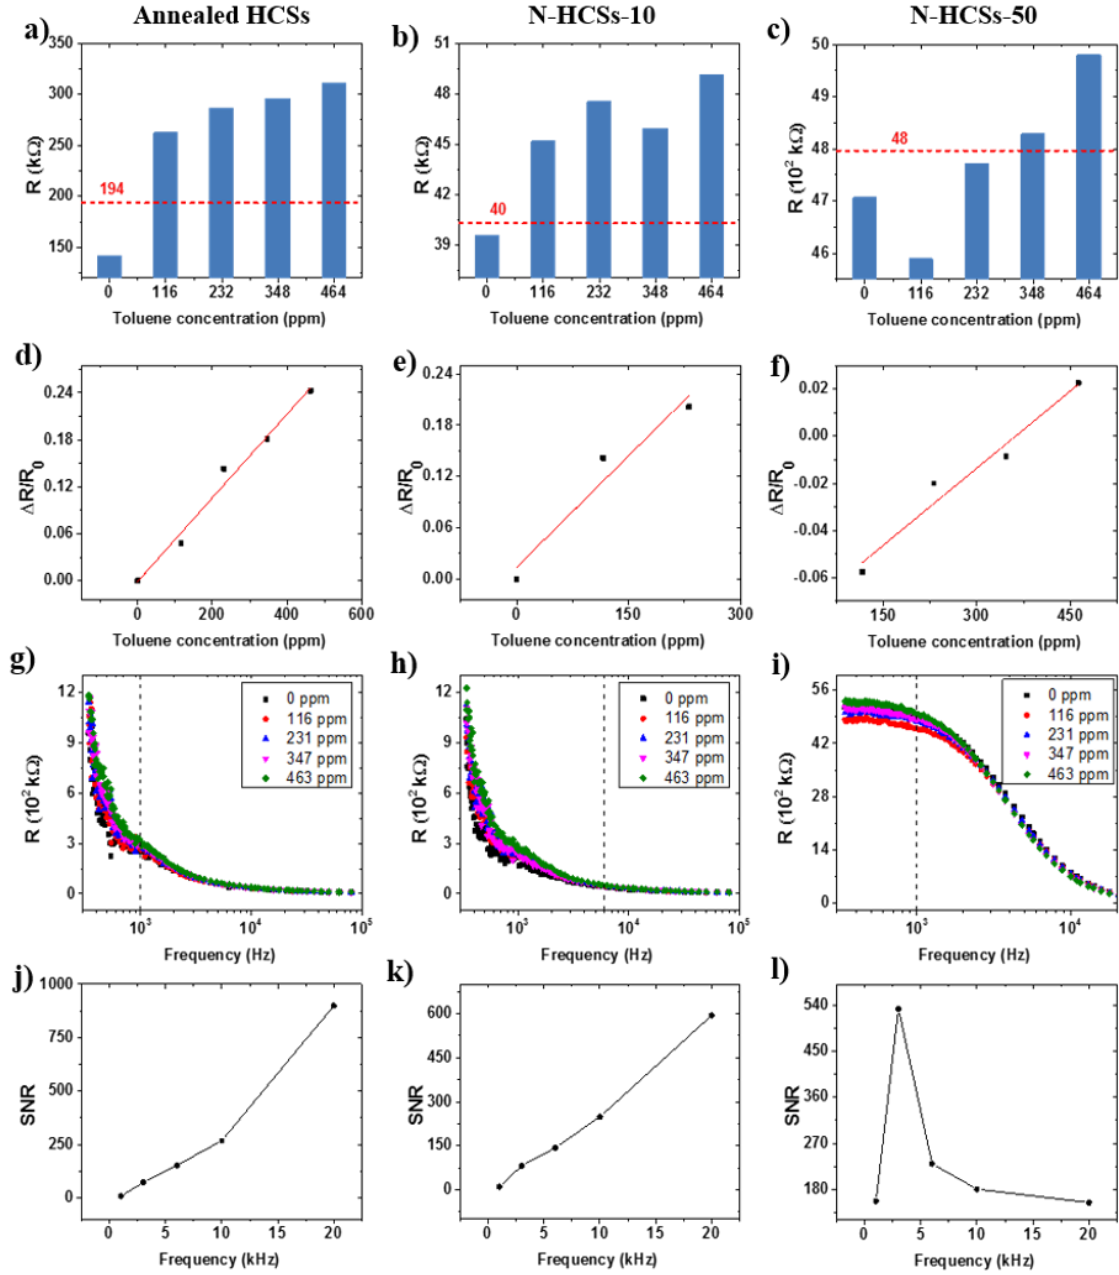

**Figure S4:** (a-c) Sensor resistance as a function of analyte (toluene) concentration, the red line indicates the estimated *LoD* resistance of the corresponding sensor; (d-f) response of the sensor versus analyte concentration; (g-i) sensor resistance dependence on frequency, dashed line indicates the optimum operating frequency and (j-l) sensor signal to noise ratio as a function of frequency. Corresponding results based on annealed HCSs, N-HCSs-10 and N-HCSs-50 are presented in the first, second and third column, respectively.

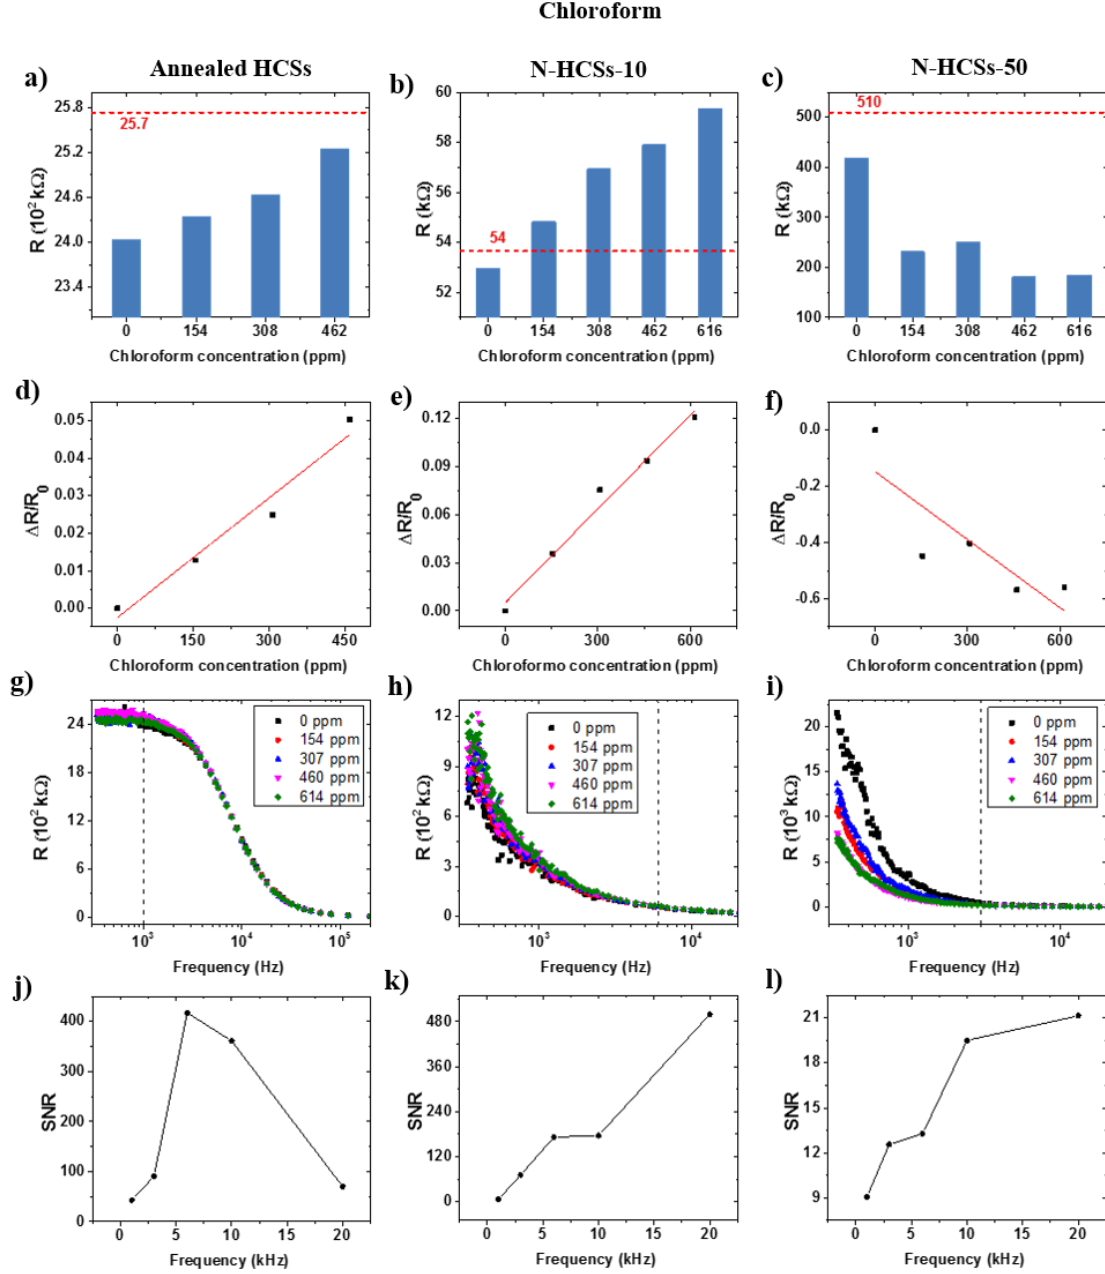

**Figure S5:** (a-c) Sensor resistance as a function of analyte (chloroform) concentration, the red line indicates the estimated  $LoD$  resistance of the corresponding sensor; (d-f) response of the sensor versus analyte concentration; (g-i) sensor resistance dependence on frequency, dashed line indicates the optimum operating frequency and (j-l) sensor signal to noise ratio as a function of frequency. Corresponding results based on annealed HCSs, N-HCSs-10 and N-HCSs-50 are presented in the first, second and third column, respectively.

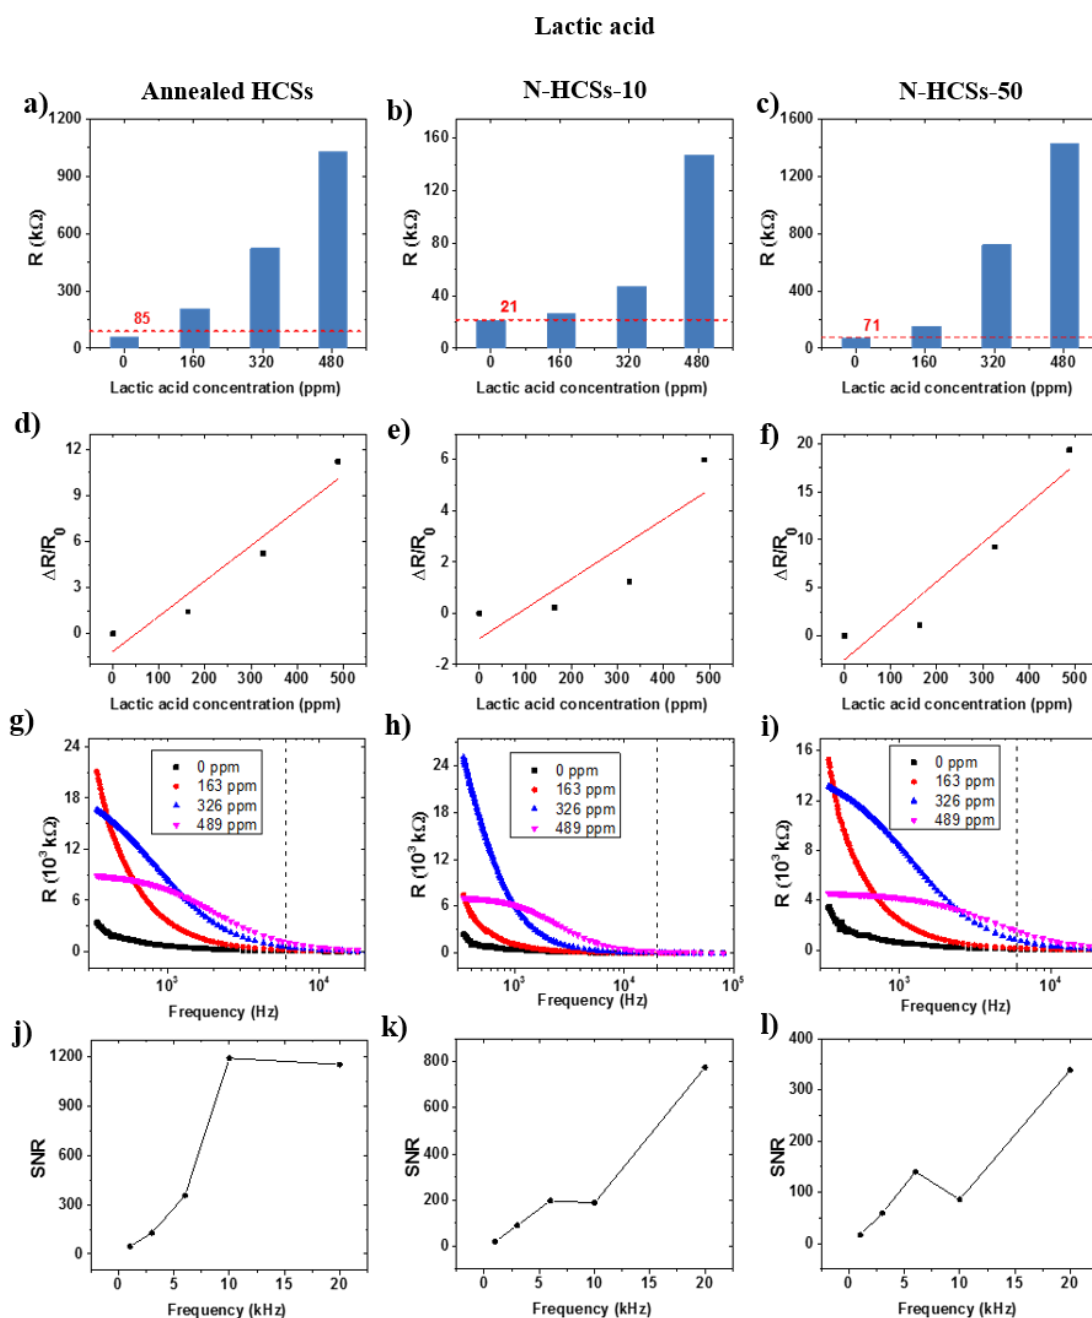

**Figure S6:** (a-c) Sensor resistance as a function of analyte (lactic acid) concentration, the red line indicates the estimated  $LoD$  resistance of the corresponding sensor; (d-f) response of the sensor versus analyte concentration; (g-i) sensor resistance dependence on frequency, dashed line indicates the optimum operating frequency and (j-l) sensor signal to noise ratio as a function of frequency. Corresponding results based on annealed HCSs, N-HCSs-10 and N-HCSs-50 are presented in the first, second and third column, respectively.

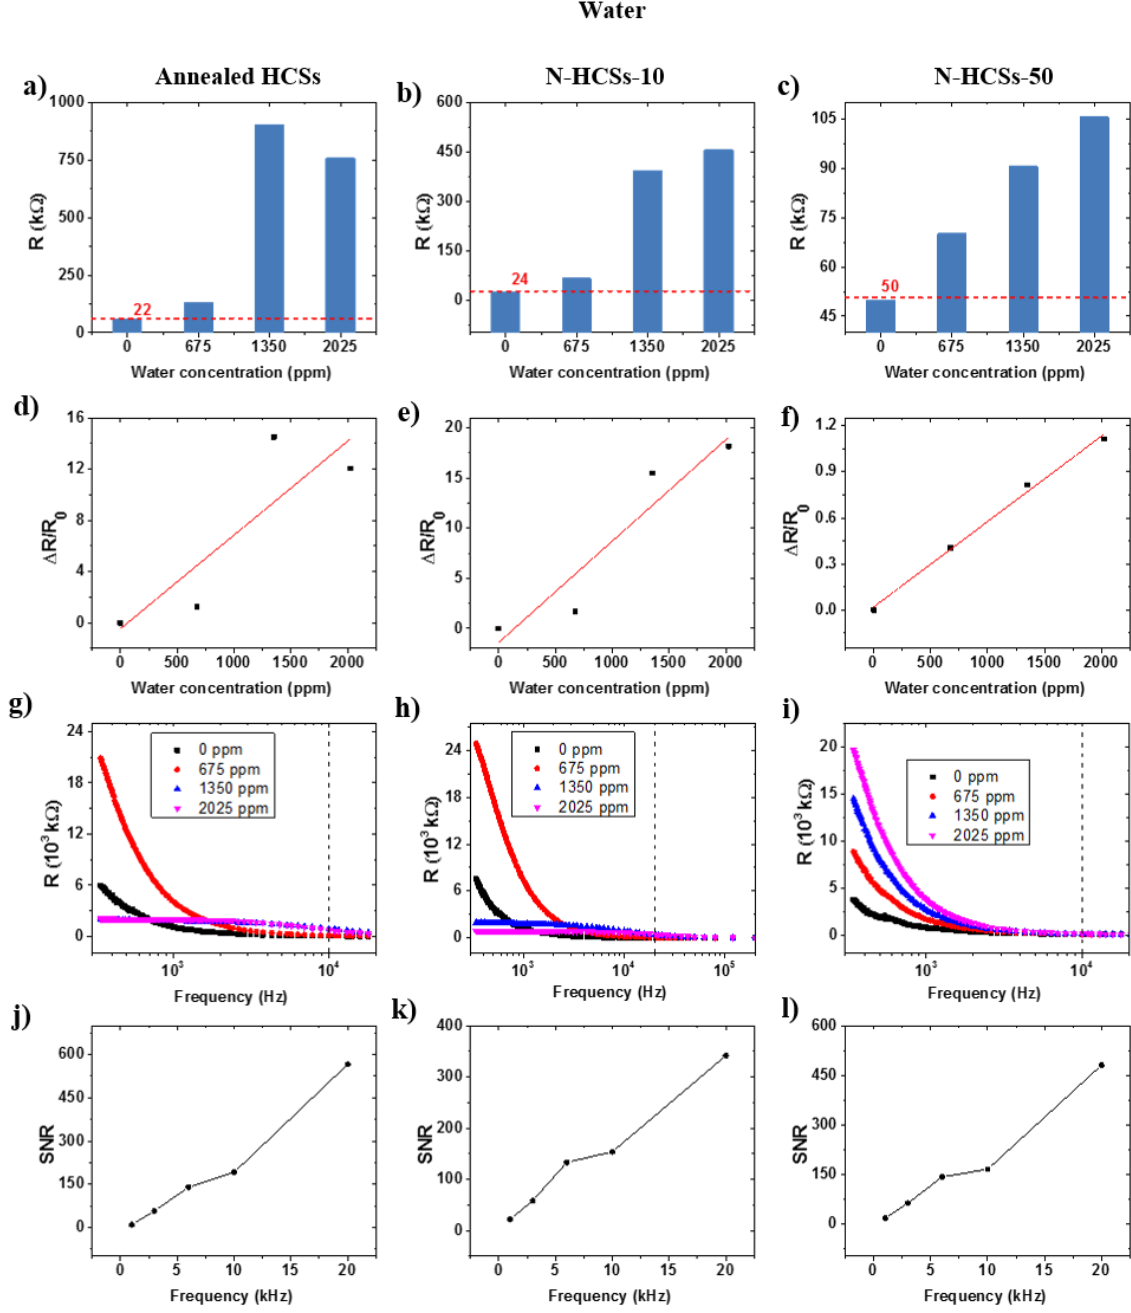

**Figure S7:** (a-c) Sensor resistance as a function of analyte (water) concentration, the red line indicates the estimated  $LoD$  resistance of the corresponding sensor; (d-f) response of the sensor versus analyte concentration; (g-i) sensor resistance dependence on frequency, dashed line indicates the optimum operating frequency and (j-l) sensor signal to noise ratio as a function of frequency. Corresponding results based on annealed HCSs, N-HCSs-10 and N-HCSs-50 are presented in the first, second and third column, respectively.

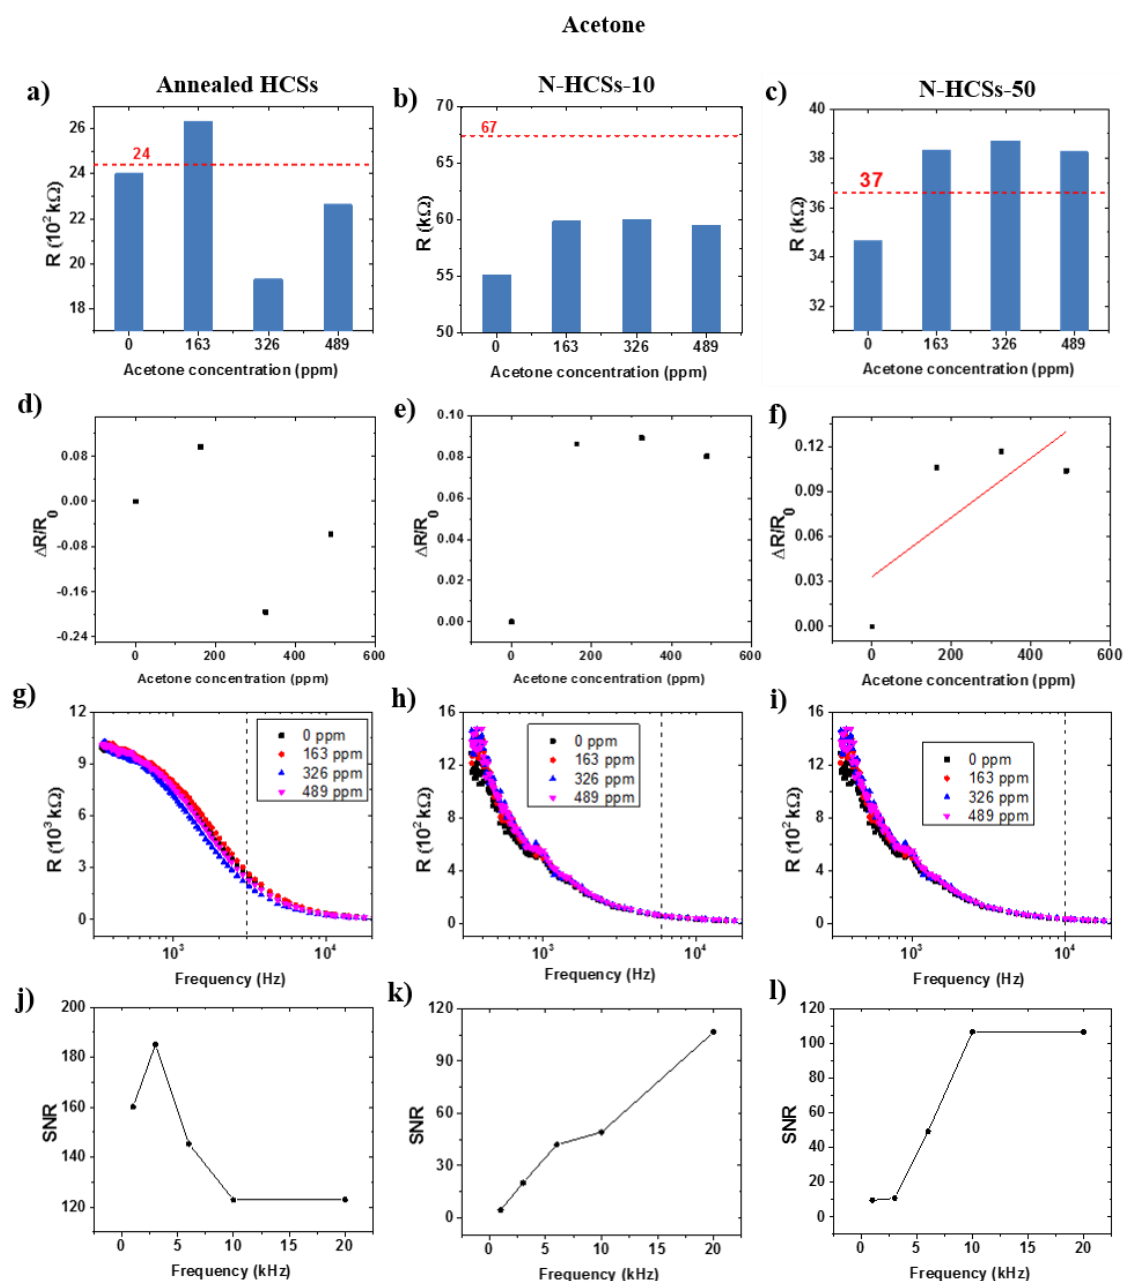

**Figure S8:** (a-c) Sensor resistance as a function of analyte (acetone) concentration, the red line indicates the estimated  $LoD$  resistance of the corresponding sensor; (d-f) response of the sensor versus analyte concentration; (g-i) sensor resistance dependence on frequency, dashed line indicates the optimum operating frequency and (j-l) sensor signal to noise ratio as a function of frequency. Corresponding results based on annealed HCSs, N-HCSs-10 and N-HCSs-50 are presented in the first, second and third column, respectively.

## References

- 1 M. Thommes, *Chemie Ing. Tech.*, 2010, **82**, 1059–1073.
